# Supplementary material for: Social Acceptability of a Sustainable Forestry Industry in Puerto Rico: Views of Private, Public, and Non-Profit Sectors
Source: MDPI journal article supplement (doi:10.3390/f13040576), 2022-04-06
Supplement: s1 [file s1]

Archive with 1 entries (1 files):
- forests-1623233 supplementary.pdf
